# Supplementary material for: Target Low-Density Lipoprotein-Cholesterol and Secondary Prevention for Patients with Acute Myocardial Infarction: A Korean Nationwide Cohort Study
Source: MDPI journal article supplement (doi:10.3390/jcm11092650), 2022-05-08

## **Supplementary Materials**

### **I. Supplementary Tables**

**Table S1.** Statin intensity classification

**Table S2.** Statin exposure and LDL-C reduction

**Table S3.** Patients with ongoing statin therapy and an LDL-C level > 70 mg/dL at the 1-year follow-up visit

**Table S4.** Crude and adjusted hazard ratios of the primary endpoint

**Table S5.** Cox's proportional hazard model analysis of the primary endpoint

### **II. Supplementary Figures**

**Figure S1.** Distribution of absolute changes in LDL-C from the index event

**Figure S2.** Cumulative incidence of the primary endpoint by percentage changes in LDL-C from the index event.

**Figure S3.** (A) Spline curve for the association of absolute changes in LDL-C with the risk of MACCE. (B) Spline curve for the association of follow-up LDL-C level with the risk of MACCE.

**Figure S4.** Subgroup analysis of target LDL-C achievement for the primary endpoint.

**Table S1.** Statin intensity classification.

|               | <b>Low-</b> | <b>Medium-</b> | <b>High-</b> |
|---------------|-------------|----------------|--------------|
| <b>Statin</b> |             |                |              |
| Atorvastatin  | -           | 10 ~ <40 mg    | ≥40 mg       |
| Rosuvastatin  | -           | 5 ~ <20 mg     | ≥20 mg       |
| Simvastatin   | <20 mg      | 20 ~ <80mg     | 80 mg        |
| Pitavastatin  | 1 mg        | 2 ~ 4 mg       | -            |
| Pravastatin   | <40 mg      | 40 ~ 80 mg     | -            |
| Fluvastatin   | ≤40 mg      | 80 mg          |              |

**Table S2.** Statin exposure and LDL-C reduction.

| Characteristics              | Overall<br>(N = 5,049) | Non-achiever<br>(n = 3,935) | Achiever<br>(n = 1,114) | P value |
|------------------------------|------------------------|-----------------------------|-------------------------|---------|
| Index MI admission           |                        |                             |                         |         |
| LDL-C (mmol/L)               | 3.1 [ 2.4; 3.7]        | 2.9 [ 2.2; 3.6]             | 3.4 [ 3.0; 3.9]         | <0.001  |
| Statin-naïve at presentation | 4547 (90.1%)           | 3481 (88.5%)                | 1066 (95.7%)            | <0.001  |
| Statin at discharge          |                        |                             |                         |         |
| Atorvastatin                 | 2340 (46.3%)           | 1863 (47.3%)                | 477 (42.8%)             |         |
| Rosuvastatin                 | 1944 (38.5%)           | 1398 (35.5%)                | 546 (49.0%)             |         |
| Simvastatin                  | 281 (5.6%)             | 234 (5.9%)                  | 47 (4.2%)               |         |
| Pitavastatin                 | 210 (4.2%)             | 188 (4.8%)                  | 22 (2.0%)               |         |
| Pravastatin                  | 45 (0.9%)              | 42 (1.1%)                   | 3 (0.3%)                |         |
| Fluvastatin                  | 4 (0.1%)               | 4 (0.1%)                    | 0 (0.0%)                |         |
| One-year follow-up visit     |                        |                             |                         |         |
| LDL-C (mmol/L)               | 1.9 [ 1.5; 2.3]        | 2.1 [ 1.7; 2.5]             | 1.4 [ 1.2; 1.6]         | <0.001  |
| LDL-C reduction (mmol/L)     | 1.1 [ 0.4; 1.8]        | 0.9 [ 0.2; 1.4]             | 2.0 [ 1.7; 2.4]         | <0.001  |
| No reduction or increase     | 740 (14.7%)            | 740 (18.8%)                 | 0 (0.0%)                |         |
| 0 - 50% reduction            | 2871 (56.9%)           | 2871 (73.0%)                | 0 (0.0%)                |         |
| ≥ 50% reduction              | 1438 (28.5%)           | 324 (8.2%)                  | 1114 (100.0%)           |         |
| Statin                       |                        |                             |                         |         |
| On-going                     | 4580 (90.7%)           | 3541 (90.0%)                | 1039 (93.3%)            | <0.001  |
| Newly started                | 234 (4.6%)             | 186 (4.7%)                  | 48 (4.3%)               |         |
| Stopped                      | 102 (2.0%)             | 82 (2.1%)                   | 20 (1.8%)               |         |

|                          |              |              |              |       |
|--------------------------|--------------|--------------|--------------|-------|
| No use                   | 121 (2.4%)   | 117 (3.0%)   | 4 (0.4%)     |       |
| Statin during follow-up  |              |              |              |       |
| On-going at 2-year visit | 4545 (90.0%) | 3513 (89.3%) | 1032 (92.6%) | 0.008 |
| On-going at 3-year visit | 4363 (86.4%) | 3374 (85.7%) | 989 (88.8%)  | 0.001 |

---

Values are presented as median [interquartile range] or n (%). LDL-C, low-density lipoprotein cholesterol.

**Table S3.** Patients with ongoing statin therapy and an LDL-C level > 70 mg/dL at the 1-year follow-up visit.

| Characteristics                    | No reduction or<br>increase<br>(n = 479) | 0-50% reduction<br>(n = 1,662) | ≥ 50% reduction<br>(n = 303) | P value          |
|------------------------------------|------------------------------------------|--------------------------------|------------------------------|------------------|
| <b>Demographics</b>                |                                          |                                |                              |                  |
| Age, year                          | 62.0 [53.0;72.0]                         | 59.0 [51.0;69.0]               | 56.0 [47.5;65.0]             | <0.001           |
| Female sex                         | 126 (26.3%)                              | 371 (22.3%)                    | 73 (24.1%)                   | 0.182            |
| BMI > 23 kg/m <sup>2</sup>         | 328 (68.5%)                              | 1149 (69.1%)                   | 212 (70.0%)                  | 0.907            |
| Current smoker                     | 178 (37.2%)                              | 787 (47.4%)                    | 143 (47.2%)                  | <0.001           |
| Hypertension                       | 286 (59.7%)                              | 730 (43.9%)                    | 96 (31.7%)                   | <0.001           |
| Diabetes                           | 181 (37.8%)                              | 312 (18.8%)                    | 45 (14.9%)                   | <0.001           |
| Statin-naïve at presentation       | 360 (75.2%)                              | 1502 (90.4%)                   | 290 (95.7%)                  | <0.001           |
| History of PCI/CABG                | 66 (13.8%)                               | 29 (1.7%)                      | 6 (2.0%)                     | <0.001           |
| Chronic kidney disease             | 16 (3.3%)                                | 25 (1.5%)                      | 5 (1.7%)                     | 0.032            |
| <b>Clinical presentation</b>       |                                          |                                |                              |                  |
| STEMI                              | 215 (44.9%)                              | 897 (54.0%)                    | 164 (54.1%)                  | 0.002            |
| Multivessel disease                | 216 (45.1%)                              | 764 (46.0%)                    | 126 (41.6%)                  | 0.369            |
| LM disease                         | 31 (6.5%)                                | 63 (3.8%)                      | 16 (5.3%)                    | 0.035            |
| LVEF <40%                          | 64 (13.4%)                               | 177 (10.6%)                    | 24 (7.9%)                    | 0.053            |
| Complete revascularization         | 291 (60.8%)                              | 1131 (68.1%)                   | 217 (71.6%)                  | 0.002            |
| <b>Statin therapy at discharge</b> |                                          |                                |                              | <b>&lt;0.001</b> |
| Low-intensity                      | 12 (2.5%)                                | 24 (1.4%)                      | 2 (0.7%)                     |                  |

|                  |             |              |             |  |
|------------------|-------------|--------------|-------------|--|
| Medium-intensity | 364 (76.0%) | 1139 (68.5%) | 131 (43.2%) |  |
| High-intensity   | 86 (18.0%)  | 485 (29.2%)  | 168 (55.4%) |  |

#### LDL-C levels

|                           |                  |                 |                 |        |
|---------------------------|------------------|-----------------|-----------------|--------|
| Baseline (mmol/L)         | 2.1 [ 1.8; 2.5]  | 3.4 [ 2.9; 3.9] | 4.7 [ 4.2; 5.2] | <0.001 |
| 1-year follow-up (mmol/L) | 2.6 [ 2.2; 3.1]  | 2.2 [ 2.0; 2.6] | 2.0 [ 1.9; 2.2] | <0.001 |
| Reduction (mmol/L)        | -0.4 [-0.8;-0.2] | 1.0 [ 0.6; 1.6] | 2.6 [ 2.3; 3.0] | <0.001 |

#### Clinical outcomes\*

|                          |           |           |           |       |
|--------------------------|-----------|-----------|-----------|-------|
| MACCE                    | 25 (5.2%) | 47 (2.8%) | 10 (3.3%) | 0.033 |
| Cardiovascular mortality | 7 (1.5%)  | 15 (0.9%) | 2 (0.7%)  | 0.439 |
| Recurrent MI             | 10 (2.1%) | 25 (1.5%) | 5 (1.7%)  | 0.649 |
| Ischemic stroke          | 9 (1.9%)  | 8 (0.5%)  | 4 (1.3%)  | 0.009 |

---

Values are presented as median [interquartile range] or n (%). BMI, body mass index; CABG, coronary artery bypass graft surgery; HF, heart failure; LDL-C, low-density lipoprotein cholesterol; LM, left-main; LVEF, left ventricular ejection fraction; MACCE, major adverse cardiac and cerebrovascular events; MI, myocardial infarction; PCI, percutaneous coronary intervention; STEMI, ST-segment elevation MI. \*The log-rank test *p*-values are presented for clinical outcomes comparing the three groups according to the percentage reduction in LDL-C.

**Table S4.** Crude and adjusted hazard ratios of the primary endpoint.

| Target LDL-C achiever         | Crude                 | P-value | *Adjusted             | P-value |
|-------------------------------|-----------------------|---------|-----------------------|---------|
| (vs. non-achiever)            | Hazard Ratio (95% CI) |         | Hazard Ratio (95% CI) |         |
| Cox proportional hazard model | 0.61 [0.39 - 0.94]    | 0.024   | 0.63 [0.40 - 0.98]    | 0.041   |
| Competing risks†              | 0.61 [0.40 - 0.94]    | 0.026   | 0.63 [ 0.41 - 0.98]   | 0.041   |

\*Adjusted for age, sex, body mass index, smoking, hypertension, diabetes, statin usage before index event, history of PCI/CABG, chronic kidney disease, multivessel disease at index event, left-main disease at index event, presentation as STEMI, LV ejection fraction < 40%, LDL-C at index event (mmol/L), and complete revascularization after index event. †Non-cardiovascular death was modelled as a single competing outcome by using the Fine-Gray method. CI, confidence interval.

**Table S5.** Cox's proportional hazard model analysis of the primary endpoint.

| <b>Variables</b>                       | <b>Univariable</b> | <b><i>P</i>-value</b> | <b>Multivariable</b> | <b><i>P</i>-value</b> |
|----------------------------------------|--------------------|-----------------------|----------------------|-----------------------|
|                                        | <b>HR (95% CI)</b> |                       | <b>HR (95% CI)</b>   |                       |
| Age (per years)                        | 1.04 [1.02 - 1.05] | <0.001                | 1.03 [1.01 - 1.04]   | 0.002                 |
| Female                                 | 1.40 [0.99 - 1.98] | 0.056                 | 0.98 [0.67 - 1.44]   | 0.920                 |
| Body mass index > 23 kg/m <sup>2</sup> | 0.65 [0.48 - 0.89] | 0.008                 | 0.77 [0.56 - 1.07]   | 0.120                 |
| Hypertension                           | 1.62 [1.18 - 2.21] | 0.003                 | 1.15 [0.82 - 1.62]   | 0.413                 |
| Diabetes                               | 2.36 [1.73 - 3.21] | <0.001                | 1.90 [1.36 - 2.66]   | < 0.001               |
| Smoking                                | 0.65 [0.47 - 0.90] | 0.010                 | 1.02 [0.70 - 1.49]   | 0.900                 |
| Chronic kidney disease                 | 4.77 [2.76 - 8.25] | <0.001                | 2.49 [1.38 - 4.47]   | 0.002                 |
| Previous PCI/CABG                      | 3.32 [2.06 - 5.36] | <0.001                | 2.26 [1.34 - 3.81]   | 0.002                 |
| Statin usage before index MI           | 0.65 [0.35 - 1.20] | 0.168                 | 0.46 [0.24 - 0.86]   | 0.015                 |
| LVEF < 40%                             | 2.50 [1.74 - 3.59] | <0.001                | 1.90 [1.30 - 2.76]   | < 0.001               |
| Presentation as STEMI                  | 0.83 [0.61 - 1.13] | 0.247                 | 1.03 [0.75 - 1.43]   | 0.834                 |
| Left-main disease                      | 1.76 [0.96 - 3.25] | 0.070                 | 1.13 [0.56 - 2.29]   | 0.730                 |
| Multivessel disease                    | 1.52 [1.12 - 2.07] | 0.008                 | 1.18 [0.79 - 1.77]   | 0.410                 |
| Complete revascularization             | 0.58 [0.43 - 0.79] | <0.001                | 0.80 [0.54 - 1.17]   | 0.251                 |



|                                    |                    |       |                    |       |
|------------------------------------|--------------------|-------|--------------------|-------|
| High-intensity statin at discharge | 0.83 [0.60 - 1.16] | 0.284 | 0.98 [0.70 - 1.38] | 0.904 |
| LDL-C at index admission (mmol/L)  | 0.83 [0.71 - 0.98] | 0.025 | 1.05 [0.89 - 1.24] | 0.535 |
| Target LDL-C achievement           | 0.61 [0.39 - 0.94] | 0.024 | 0.63 [0.40 - 0.99] | 0.044 |

---

MI, myocardial infarction; CABG, coronary artery bypass graft surgery; PCI, percutaneous coronary intervention; LDL-C, low-density lipoprotein cholesterol; LVEF, left ventricular ejection fraction; STEMI, ST-segment elevation MI.

**Figure S1.** Distribution of absolute changes in LDL-C from the index event. Median and interquartile values are 1.1 [0.4 - 1.8] mmol/L (dotted lines). LDL-C, low-density lipoprotein cholesterol; MI, myocardial infarction

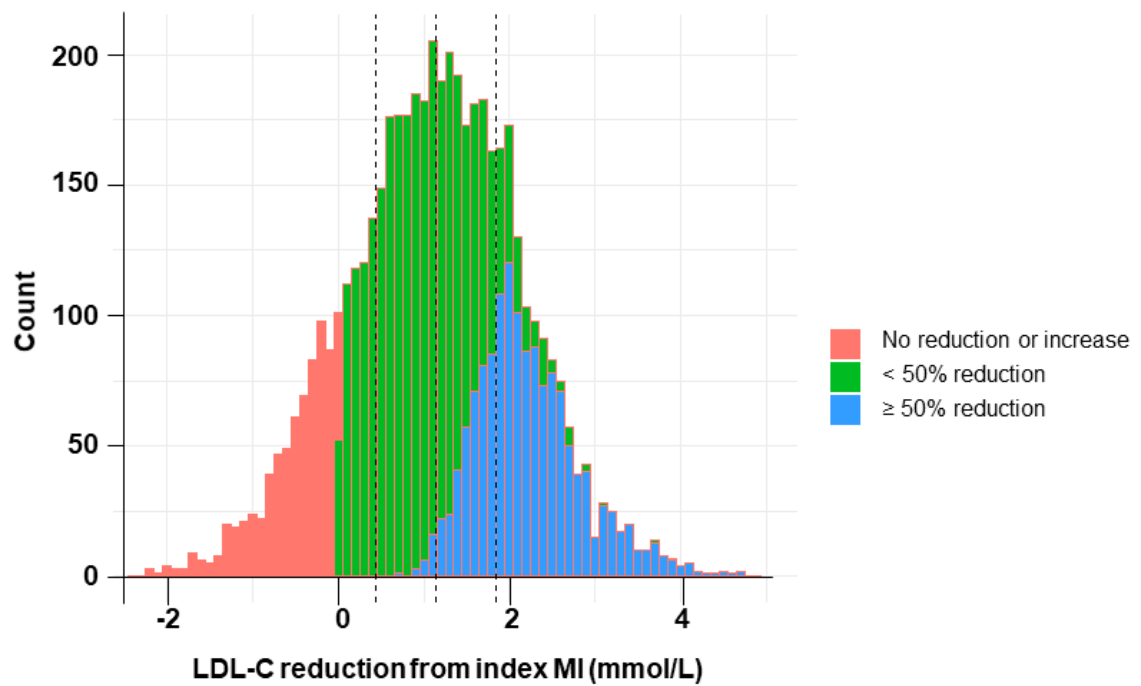

**Figure S2.** Cumulative incidence of the primary endpoint by percentage changes in LDL-C from the index event. LDL-C, low-density lipoprotein cholesterol; MI, myocardial infarction

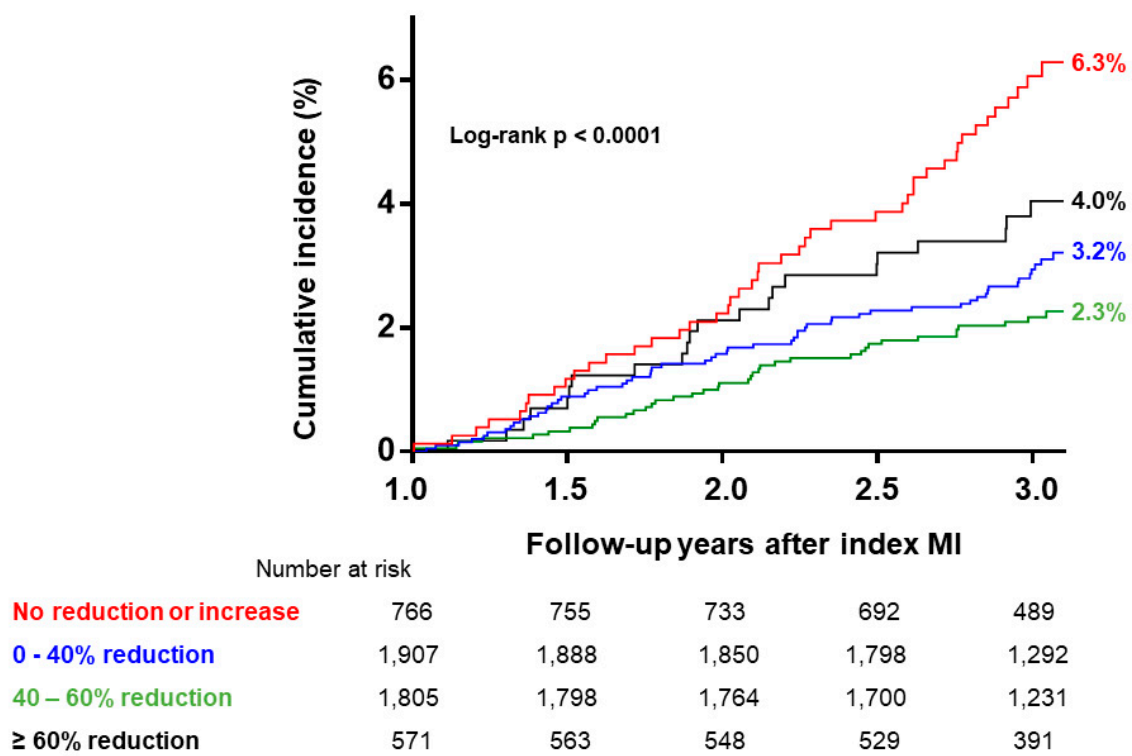

**Figure S3.** (A) Spline curve for the association of absolute changes in LDL-C with the risk of MACCE.

Median and interquartile range are presented as dotted lines. (B) Spline curve for the association of follow-up LDL-C level with the risk of MACCE. Target LDL-C goal of 70 mg/dL is presented as a dotted line. LDL-C, low-density lipoprotein cholesterol; MACCE, major adverse cardiac and cerebrovascular event; MI, myocardial infarction

(A)

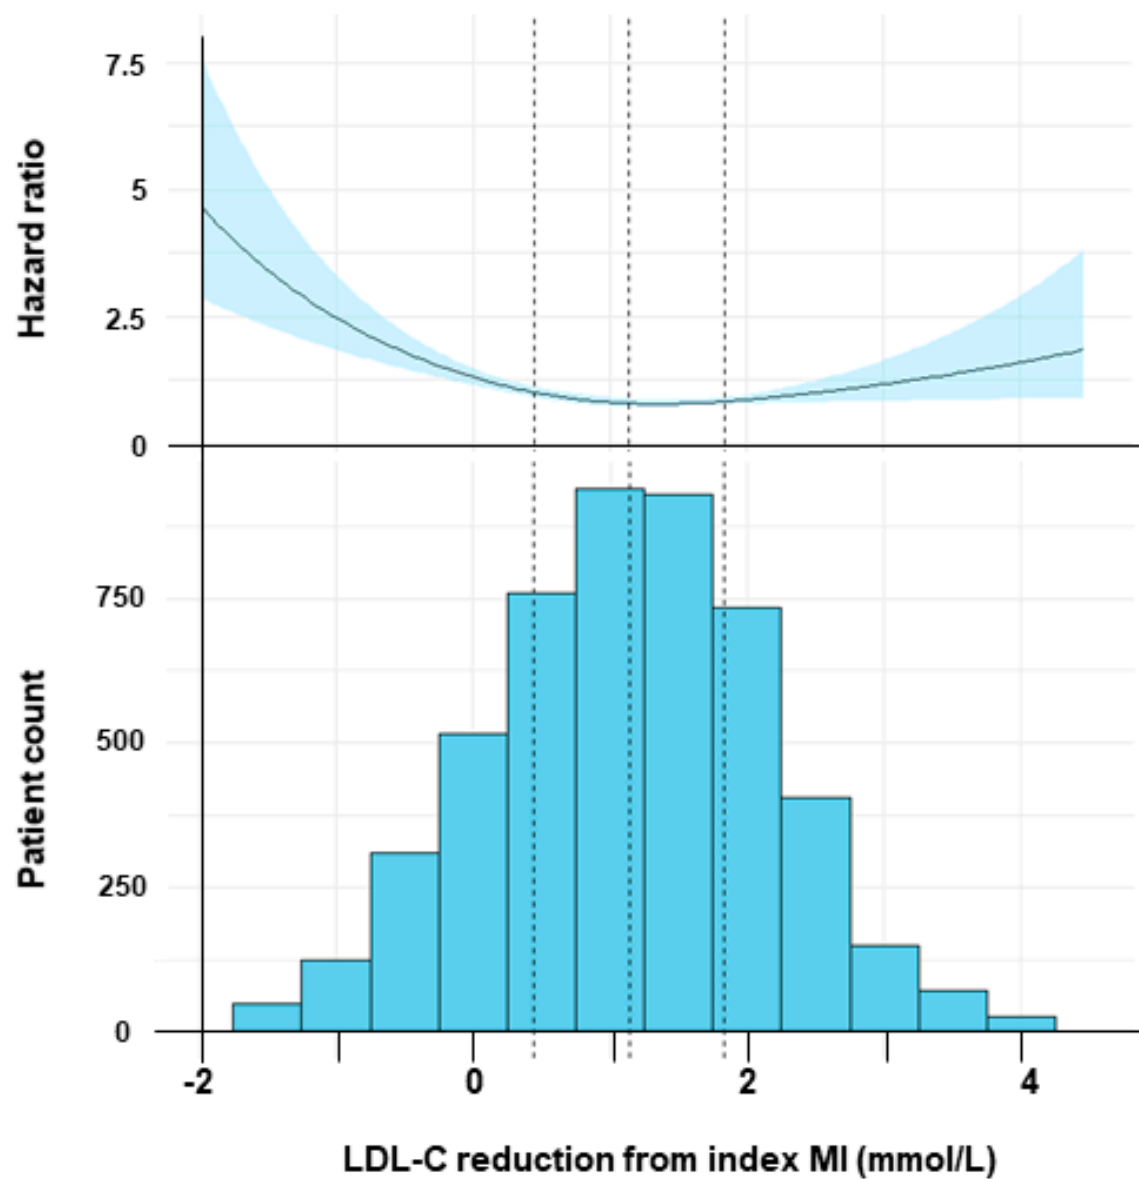

(B)

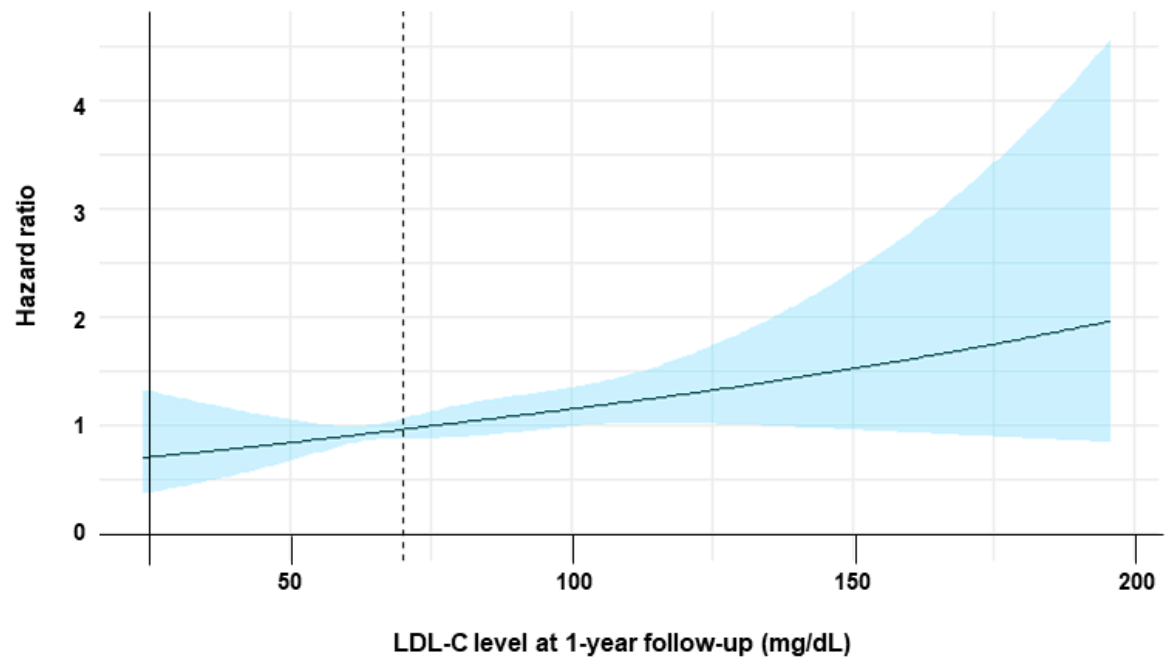

**Figure S4.** Subgroup analysis of target LDL-C achievement for the primary endpoint. CI, confidence interval; CKD, chronic kidney disease; LDL-C, low-density lipoprotein cholesterol; LVEF, left ventricular ejection fraction.

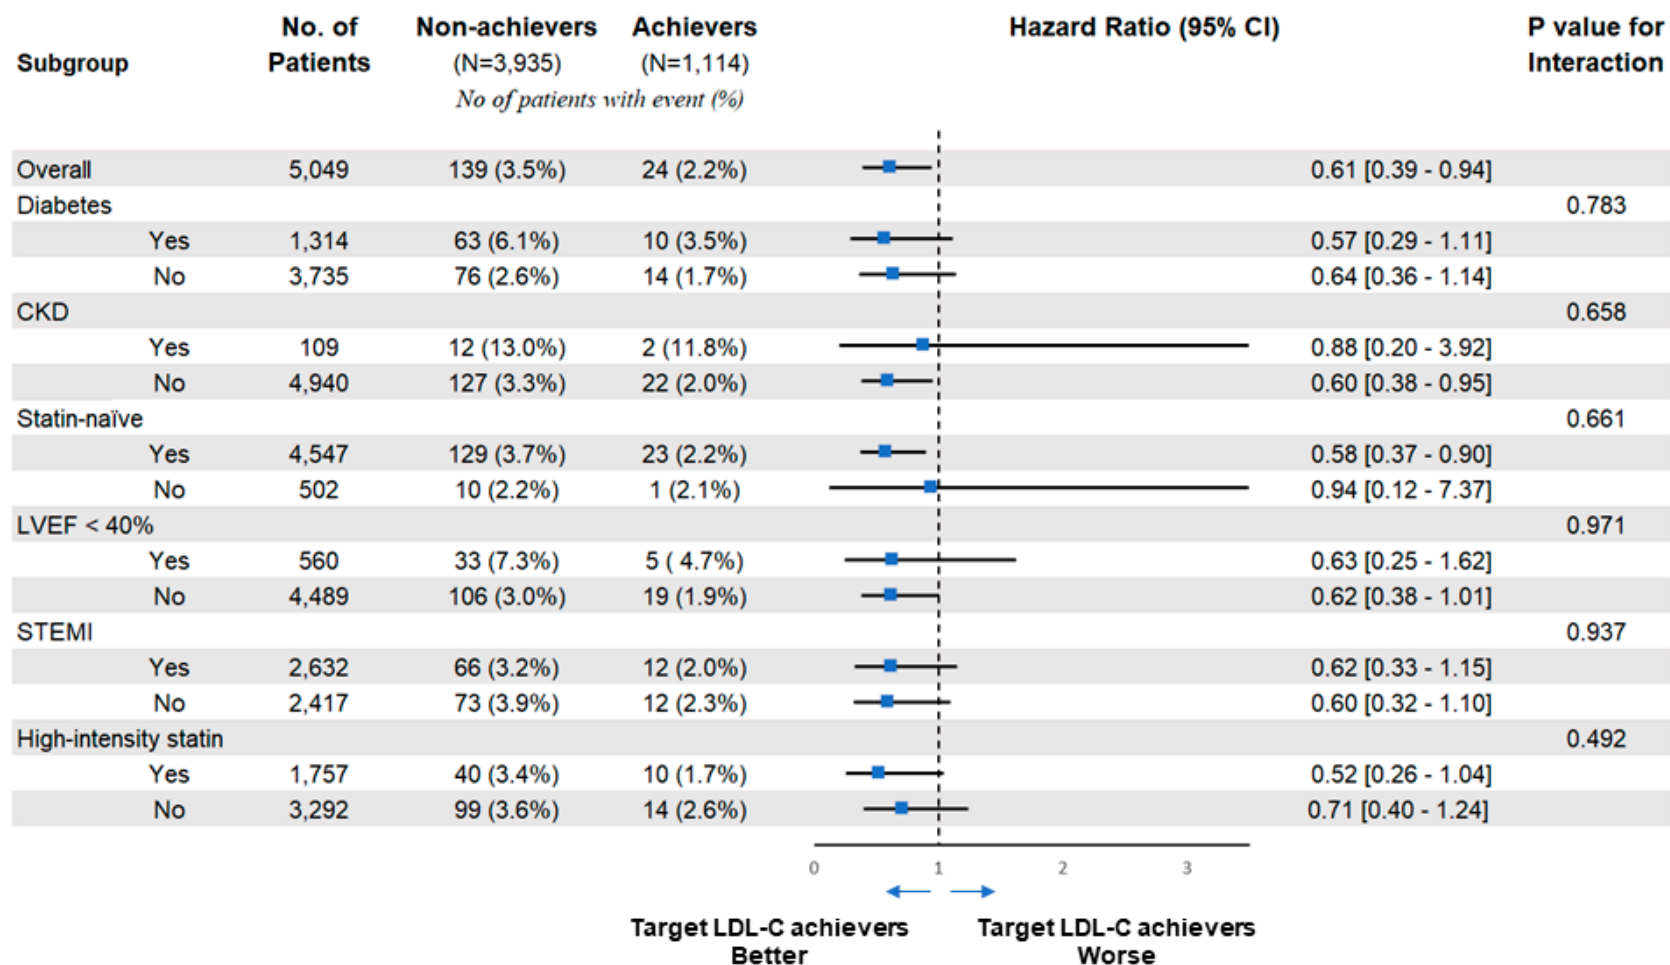

Supplement: s1 [file s1]
